# Supplementary material for: Tamarix hispida NAC Transcription Factor ThNAC4 Confers Salt and Drought Stress Tolerance to Transgenic Tamarix and Arabidopsis
Source: MDPI journal article supplement (doi:10.3390/plants11192647), 2022-10-08
Supplement: s1 [file s1]

## Supplementary Materials

**Table S1. Primers used for cloning of the *ThNAC4* gene.**

| Genes  | Forward and reverse primers (5'–3') |                         |
|--------|-------------------------------------|-------------------------|
| ThNAC4 | ATGGAAAACATTCCTGGAT                 | TTAATAGTAACCCCAAAGGTC   |
| M13    | CGCCAGGGTTTTCCAGTCACGAC             | GAGCGGATAACAATTCACACAGG |

**Table S2. Primers used in constructing recombinant plasmid pROKII-ThNAC4.**

| Genes                 | Forward and reverse primers (5'–3') |                          |
|-----------------------|-------------------------------------|--------------------------|
| pROKII- <i>ThNAC4</i> | CTCTAGAGGATCCCCGGGATGGA             | TCGAGCTCGGTACCCGGGTAAATA |
|                       | AAACATTCCTGGAT                      | GTAACCCCAAAGGTC          |
| <i>ThNAC4</i>         | ATGGAAAACATTCCTGGAT                 | TTAATAGTAACCCCAAAGGTC    |

**Table S3. Primers used in constructing recombinant plasmid pFGC5941-ThNAC4.**

| Genes         | Forward and reverse primers (5'–3') |                         |
|---------------|-------------------------------------|-------------------------|
| ThNAC4-Cis    | ATAAGGAAGTTCATTTCATTTG              | CAATCAAATGAAGAGCCAAT    |
| ThNAC4-Anti   | CTTACTTACACTTGCCTTGGAG              | ATCTGAGCTACACATGCTCAG   |
| pFGC5941-Cis  | CATGATTTAAATCAACAGATGAG             | TTGGCGCCATGCCAAATTAGGAG |
|               | ATTCAGC                             | GAGG                    |
| pFGC5941-Anti | CCTTAATTAAATGCCAAATTAGG             | CGCGGATCCGCAACAGATGAGAT |
|               | AGGAGG                              | TTCAGC                  |

**Table S4. Primers used in constructing recombinant plasmid pBI121-ThNAC4-GFP.**

| Genes             | Forward and reverse primers (5'–3') |                         |
|-------------------|-------------------------------------|-------------------------|
| pBI121-GFP        | ATGGAAAACATTCCTGGAT                 | ATAGTAACCCCAAAGGTCTC    |
| pBI121-ThNAC4-GFP | TCTAGACTGGTACCCGGGATGGA             | CTAGTCAGTCGACCCGGGATAGT |
|                   | AAACATTCCTGGAT                      | AACCCCAAAGGTCTC         |

**Table S5. Gene-specific primers used in real-time PCR.**

| Genes                       | GenBank<br>number | Forward and reverse primers (5'–3') |                      |
|-----------------------------|-------------------|-------------------------------------|----------------------|
| <i>Tamarix hispida</i>      |                   |                                     |                      |
| <i>ThNAC4</i>               | JQ974958          | CTACTGGGAAGGACAAAG                  | ATTAGACATGATGGTGGGG  |
| <i>β-actin</i>              | FJ618517          | AAACAATGGCTGATGCTG                  | ACAATACCGTGCTCAATAGG |
| <i>α-tubulin</i>            | FJ618518          | CACCCACCGTTGTTCCAG                  | ACCGTCGTCATCTTCACC   |
| <i>β-tubulin</i>            | FJ618519          | GGAAGCCATAGAAAGACC                  | CAACAAATGTGGGATGCT   |
| <i>Arabidopsis thaliana</i> |                   |                                     |                      |
| <i>α-tubulin</i>            | AT1G50010         | GATGTACCGTGGTGATGTC                 | GAGCCTCTGAAAATTCTCC  |

**Table S6. Primer sequences of SOD, POD and Trehalose synthase genes used in real-time PCR.**

| Genes            | GenBank<br>number | Forward and reverse primers (5'–3') |                       |
|------------------|-------------------|-------------------------------------|-----------------------|
| <i>α-tubulin</i> | At1G50010         | GATGTACCGTGGTGATGTC                 | GAGCCTCTGAAAATTCTCC   |
| <i>Ubiquitin</i> | AT1G55060         | GGAAAGCAGCTCGAAGATG                 | AAGCTTCCACCGCGGAGAC   |
| <i>SOD1</i>      | AT1G12520         | GTCACCCGGAACCCACAGC                 | CCGAATAAAAGGCCTCTCC   |
| <i>SOD2</i>      | AT3G56350         | GAAGGAGGTGGCAAACCAC                 | TCTTGTAAGTGTGGATAGTAG |
| <i>SOD3</i>      | AT5G23310         | CGCTGCACAGGTCTATAACC                | AATATCGTCCCACACGAGTG  |
| <i>SOD4</i>      | AT5G51100         | CCTGGAGGTGGAGGAAAGC                 | CTGCATTGGGCGTCTTCAC   |
| <i>POD1</i>      | AT1G05260         | CTTTCACAAACCGTCTCTAC                | AGTGGTGAGAGCAGAGTCTG  |
| <i>POD2</i>      | AT1G14550         | CCATAGGACAATCTCAATGC                | TGATCGGTTACTAATAGTC   |
| <i>POD3</i>      | AT1G24110         | TCTGACCGTTCAAGAAATGG                | TGGAGCAACCCGTAACCGTG  |
| <i>POD4</i>      | AT1G30870         | TGTGGCACCATCCAGTCGAG                | CTGCGAAAGTCTTTACAAGC  |
| <i>POD5</i>      | AT1G65970         | CAGTATGAGCCATGTGCCTG                | CAAGCAACAAAGCGAATCTC  |
| <i>POD6</i>      | AT2G18140         | TCCGGGAGCCACACCATTGG                | TGGTCGGAATTCAACAGTC   |
| <i>POD7</i>      | AT2G18150         | CCAATCCGGAAACGGAAGTC                | TCTGCATACTTCTTGACGAG  |
| <i>POD8</i>      | AT3G49110         | GCAACACTGGATTACCTGAC                | CCATCAGCATATGCTCTCAC  |
| <i>POD9</i>      | AT3G50990         | AGGTTATACAACCATACTGG                | CGTAATACTTGACCATCTC   |
| <i>POD10</i>     | AT4G11290         | TCGACAGCGAATATGCCGAC                | GAACTCTTGCTCCGATCCTC  |
| <i>POD11</i>     | AT4G17690         | GAATGGTTTCACTCTAAAGG                | GGAAGCTAACAGTCCAAGAC  |
| <i>POD12</i>     | AT4G25980         | GAACAACGGCCTGCTTCTTC                | TCCACGACCTGTCTGGTCG   |
| <i>POD13</i>     | AT4G26010         | TCCAGGACAGGCTTTCCGAC                | GAAGAGTGTATTGCTTGATG  |
| <i>POD14</i>     | AT4G30170         | AGCCGTCACGGCCTCTCTC                 | CAAGATTTGATCTGACGTG   |
| <i>POD15</i>     | AT5G47000         | GACTGTTCTGACATCCAC                  | CTTGAAGTACATGTTGTCTG  |
| <i>POD16</i>     | AT5G51890         | CTTGTCGGTGAAAGACATG                 | GACCCAAACACTCCTTTCC   |
| <i>POD17</i>     | AT5G58390         | ATCCCTCCTCCGATCACTAC                | GTCGAACCTATCGGGAGAG   |
| <i>POD18</i>     | AT5G58400         | GGCAAGCCAGGTGCGTCAC                 | TCCGGCTGTAGGATACGAC   |
| <i>POD19</i>     | AT5G66390         | CTCACTAAGTTCAAGCGTC                 | GAATAGGGTCTGGTCACCTC  |
| <i>POD20</i>     | AT5G64110         | CTGGACATACGATAGGAACG                | GACTCGAGGAGACCTCGAC   |
| <i>TPS1</i>      | NM106505          | TCCGACATGCCAGCCATTGC                | TCTCTCCTTTGAGGTCAAGC  |
| <i>TPS7</i>      | NM001331627       | CCAGATGGCTAAAGAAGAGG                | GCAAACACATTTCCCTGATG  |
| <i>TPS8</i>      | NM001334443       | GAAAGTAATCCGAGAAATGG                | AGCACGTCGGCTTCATCGTC  |
| <i>TPS11</i>     | NM127426          | TTAAACCTCAGGGAGTAAGC                | ACACTTGGGGTATCATCGAG  |
| <i>TPPB</i>      | NM106458          | ATGGGACAAGGGCCAGGCAC                | ACTTGTTAACCTGAGAAGG   |
| <i>TPPC</i>      | NM102071          | TATCCCTGGAGCTACGGTC                 | GCATCTTCATCAGTACGGTC  |
| <i>TPPD</i>      | NM103289          | TCAAAAGGACTGGGGATTGG                | CCTTGAAAGCATCCTCGTC   |
| <i>TPPF</i>      | NM117313          | GTTTGCGTCTAACTCATGG                 | CTCGGTTCCCATCTCTCAG   |
| <i>TPPG</i>      | NM118385          | TCTCGGATTAAGCAACAAC                 | CCCCCATTTACCAAAGTC    |
| <i>TPPH</i>      | NM001342553       | AAGTTTTGGAGGTTCGTCC                 | CCTCATCGGGTTCTTGCAG   |
| <i>TPPI</i>      | NM121048          | GAATGGGATAAAGGAAAGG                 | TCTTGCAAAGAATACGAAGC  |
| <i>TPPJ</i>      | AK221501          | GTTGAAACTGTCTCAAGGTC                | AGCCTTGTCTCTCCCTCG    |

**Table S7. Primer sequences used in construction pGBKT7-ThNAC4 vector.**

| Genes         | Forward and reverse primers (5'–3')      |                                           |
|---------------|------------------------------------------|-------------------------------------------|
| pGBKT7-ThNAC4 | CATGGAGGCCGAATTCATGGAAA<br>ACATTCCTGG    | GCAGGTCGACGGATCCTTAATAGT<br>AACCCCAAAG    |
| Rec2-1        | CATGGAGGCCGAATTCATGGAAA<br>ACATTCCTGGATT | GCAGGTCGACGGATCCCTGAAGA<br>AATACCATTC     |
| Rec2-2        | CATGGAGGCCGAATTCCTCAGTGT<br>CAGAGACAGG   | GCAGGTCGACGGATCCCTCTGCA<br>CTCTTCTGAAAG   |
| Rec2-3        | CATGGAGGCCGAATTCGCAGGAT<br>GTAAGAAGGTT   | GCAGGTCGACGGATCCCCATAGA<br>ATGAGTTCAACGC  |
| Rec2-4        | CATGGAGGCCGAATTCATGGATC<br>TGAATTCAATCCG | GCAGGTCGACGGATCCTTAATAGT<br>AACCCCAAAGGTC |
| Rec2-5        | CATGGAGGCCGAATTCATGGGAA<br>TTGCGTGAACG   | GCAGGTCGACGGATCCCCAACAA<br>GTGGTTTTCC     |
| Rec2-6        | CATGGAGGCCGAATTCATGAATA<br>TAGACTGGAGGG  | GCAGGTCGACGGATCCGGTGAAG<br>AGTCCGTCAATGG  |
| Rec2-7        | CATGGAGGCCGAATTCATGCCCG<br>GTTATCATGCC   | GCAGGTCGACGGATCCCGCCCTC<br>CGTTCCGTTCC    |

**Table S8. Primer sequences used in construction effector of pGADT7-rec2-ThNAC4.**

| Genes         | Forward and reverse primers (5'–3')        |                                            |
|---------------|--------------------------------------------|--------------------------------------------|
| pGBKT7-ThNAC4 | GCAGAGTGGCCATTATGGCCCAT<br>GGAAAACATTCCTGG | GCGGCCGACATGTTTTTCCCTTA<br>ATAGTAACCCCAAAG |
| pGADT7-Rec2   | ATGAACATGGAGGCCAGTG                        | GATGGATCCCGTATCGATG                        |

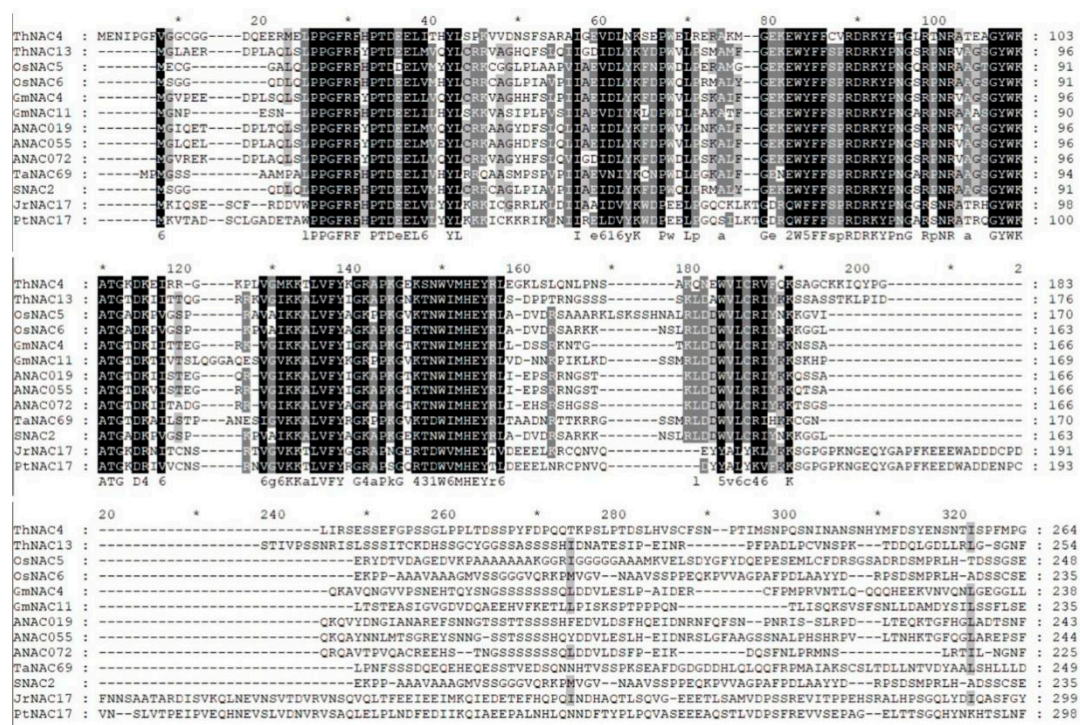

**Fig. S1 Multiple sequence alignment analysis of NAC proteins from 12 other species**

Multiple sequence alignments of ThNAC4 and 12 representative plant NACs were performed with ClustalX. The consensus NAC subdomains are shown in black color. Their corresponding accession numbers are as the follows: *Tamarix hispida* ThNAC4 (JQ974958) and ThNAC13 (JQ974967); *Oryza sativa* OsNAC5 (BAA89799), OsNAC6 (BAA89800) and SNAC2 (CBX55846); *Glycine max* GmNAC4 (AAV46124) and GmNAC11 (ACC66315); *Arabidopsis thaliana* ANAC019 (NP\_175697.1), ANAC055 (NP\_188169.1), and ANAC072 (NP\_567773.1); *Triticum aestivum* TaNAC69 (AAU08785); *Juglans regia* JrNAC17 (XP\_018848079.1); *Populus trichocarpa* PnNAC17 (AOF43232.1).

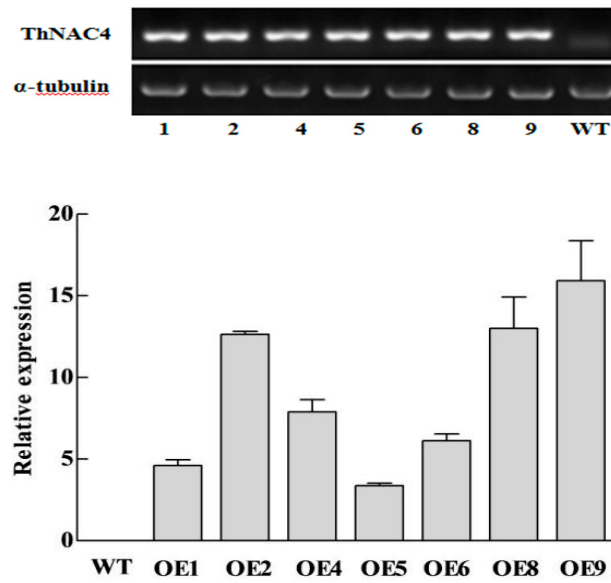

**Fig. S2 Quantitative RT-PCR analysis of *ThNAC4* expression in the WT and 9 homozygous overexpression lines (Line1-9) of *ThNAC4*-transformed *Arabidopsis***

Parallel reactions using  $\alpha$ -tubulin (AT1G50010, as an internal control) in primers were carried out to normalize the amounts of added template.

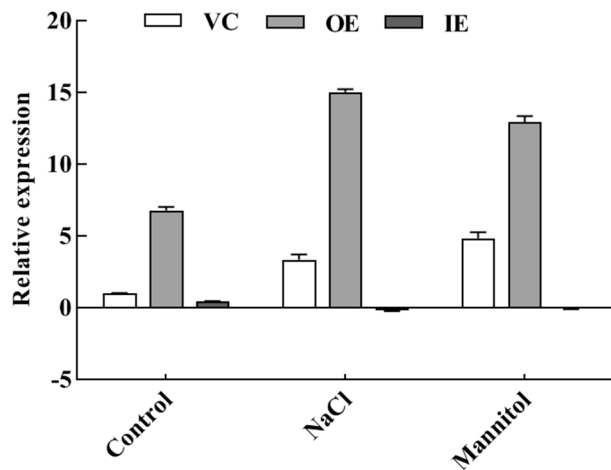

**Fig. S3 Expression of *ThNAC4* in the different kinds of transgenic *T.hispida* plants**

The expression of *ThNAC4* was determined under normal growth conditions or treatment with 150 mM NaCl or 200 mM mannitol for 24 h. The expression level of *ThNAC4* in control plants under normal growth conditions was used as the calibrator (designed as 1). VC: the pROKII vector control transformed *T. hispida* plants; OE: overexpressing of *ThNAC4* in *T. hispida* plants; IE: *ThNAC4* RNAi-silenced *T. hispida* plants. The error bars were standard deviations, which were calculated from multiple replicates of the real-time PCR.
